# Supplementary material for: Structural, MALDI-TOF-MS, Magnetic and Spectroscopic Studies of New Dinuclear Copper(ii), Cobalt(ii) and Zinc(ii) Complexes Containing a Biomimicking μ-OH bridge
Source: Royal Society of Chemistry journal article supplement (doi:10.1039/c0dt00692k), 2010-01-01
Supplement: c0dt00692k.pdf [file c0dt00692k.pdf]

**Structural, MALDI-TOF-MS, Magnetic and Spectroscopic Studies of New Dinuclear Copper(II), Cobalt(II) and Zinc(II) Complexes Containing a Biomimicking m-OH bridge.**

Cristina Núñez,<sup>1a</sup> Rufina Bastida,<sup>\*1</sup> Alejandro Macías,<sup>1</sup> Laura Valencia,<sup>2</sup> Nicolás I. Neuman,<sup>3</sup> Alberto C. Rizzi,<sup>3</sup> Carlos D. Brondino,<sup>\*3</sup> Pablo J. González,<sup>4</sup> José Luis Capelo,<sup>4,5</sup> Carlos Lodeiro,<sup>\*4,5</sup>

<sup>1</sup>Departamento de Química Inorgánica, Facultad de Química, Universidade de Santiago de Compostela, 15782, Santiago de Compostela, España.

<sup>2</sup>Departamento de Química Inorgánica, Facultad de Química, Universidade de Vigo, 36310, Vigo, Pontevedra, España.

<sup>3</sup>Departamento de Física, Facultad de Bioquímica y Ciencias Biológicas, Universidad Nacional del Litoral, Ciudad Universitaria, Paraje el Pozo, S3000ZAA Santa Fe, Argentina.

<sup>4</sup>REQUIMTE-CQFB, Departamento de Química, FCT-Universidade NOVA de Lisboa, 2829 Monte de Caparica, Portugal.

<sup>5</sup>Grupo BIOSCOPE, Departamento de Química Física, Facultad de Ciencias, Universidade de Vigo, Campus de Ourense, E32004 Ourense, España.

*\*Authors to whom correspondence should be addressed.*

*E-mail: mrufina.bastida@usc.es (R.B.)*

*E-mail: brondino@fbcb.unl.edu.ar (C.D. B.)*

*E-mail: clodeiro@uvigo.es (C. L.)*

*Keywords: Copper(II) complexes, Cobalt(II) complexes, Zn(II), macrocycle, EPR, Thiamacrocycles.*

### Supporting Information

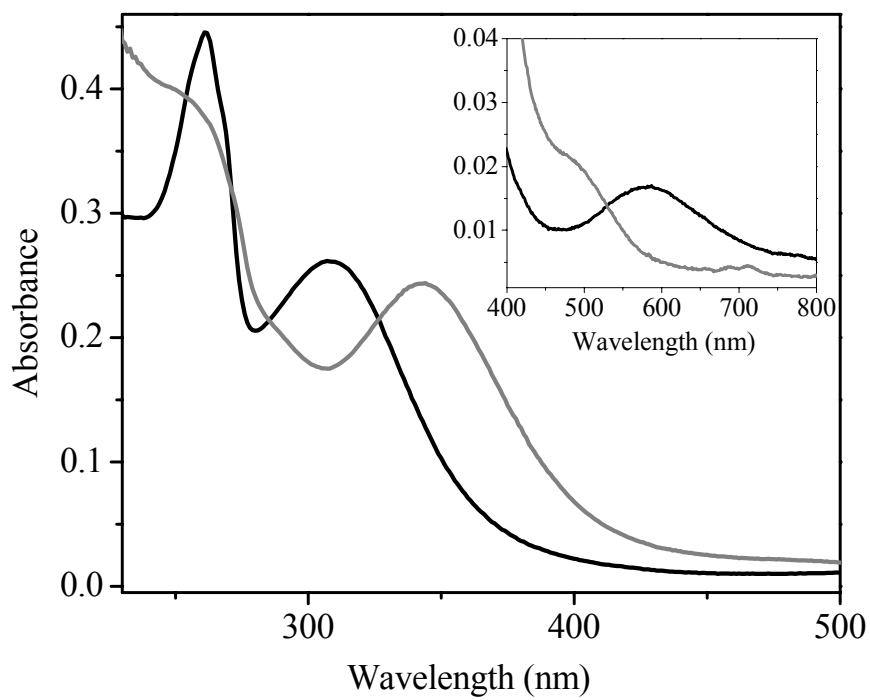

Figure S1. UV-vis spectra of an ethanolic solution of **[Co<sub>2</sub>L](BF<sub>4</sub>)<sub>4</sub>·8H<sub>2</sub>O (1)** (gray line) and **[Cu<sub>2</sub>L](BF<sub>4</sub>)<sub>4</sub>·4H<sub>2</sub>O (2)** (black line)

**Table S1.** Possible hydrogen bond distances and angles for **7**.

| D-H...A             | d(D-H)  | d(H...A) | d(D...A)   | <(DHA) |
|---------------------|---------|----------|------------|--------|
| O(1)-H(1O)...O(1W)  | 0.74(3) | 2.09(3)  | 2.821(2)   | 170(3) |
| O(1W)-H(1W)...F(3)  | 0.80(3) | 1.96(3)  | 2.754(2)   | 172(2) |
| O(1W)-H(2W)...F(6)  | 0.76(3) | 2.36(3)  | 3.0604(19) | 154(3) |
| N(2)-H(2N)...F(1)#1 | 0.86(2) | 2.16(2)  | 2.9304(19) | 149(2) |
| N(3)-H(3N)...F(3)   | 0.84(2) | 2.26(2)  | 3.017(2)   | 150(2) |
| N(5)-H(5N)...F(4)#1 | 0.83(2) | 2.47(2)  | 3.135(2)   | 138(2) |
| N(6)-H(6N)...O(1W)  | 0.87(2) | 2.32(2)  | 3.076(2)   | 146(2) |

**Table S2.** Possible hydrogen bond distances and angles for **8**.

| D-H...A              | d(D-H)   | d(H...A) | d(D...A)  | <(DHA) |
|----------------------|----------|----------|-----------|--------|
| N(2)-H(2N)...O(1N)   | 1.00(9)  | 2.31(10) | 2.971(12) | 123(7) |
| N(3)-H(3N)...O(2N)   | 1.09(10) | 1.99(10) | 3.039(12) | 162(8) |
| N(3)-H(3N)...O(1N)   | 1.09(10) | 2.46(10) | 3.369(11) | 141(7) |
| O(1)-H(1O)...O(2W)#2 | 0.88(17) | 1.99(15) | 2.80(3)   | 153(6) |
| O(1)-H(1O)...O(2W)#3 | 0.88(17) | 1.99(15) | 2.80(3)   | 153(6) |

**Table S3.** Selected bond distances and angles for **7** and **8**.

|                         | <b>7</b>   |               | <b>8</b> |
|-------------------------|------------|---------------|----------|
| <i>Bond Lengths (Å)</i> |            |               |          |
| Cu(1)-O(1)              | 1.8973(13) | N(1)-Zn       | 2.101(8) |
| Cu(1)-N(1)              | 1.9273(14) | N(2)-Zn       | 2.211(8) |
| Cu(1)-N(2)              | 2.0976(15) | N(3)-Zn       | 2.177(8) |
| Cu(1)-N(6)              | 2.0613(14) | O(1)-Zn       | 1.970(4) |
| Cu(1)-S(2)              | 2.7259(8)  | O(1w)-Zn      | 2.070(6) |
| Cu(1)-O(4S)             | 2.9313(15) | O(1n)-Zn      | 2.647(8) |
| Cu(2)-O(1)              | 1.8968(13) |               |          |
| Cu(2)-N(4)              | 1.9360(15) |               |          |
| Cu(2)-N(5)              | 2.1028(15) |               |          |
| Cu(2)-N(3)              | 2.0676(15) |               |          |
| Cu(2)-S(1)              | 2.7672(8)  |               |          |
| Cu(2)-O(2S)             | 2.8068(14) |               |          |
| <i>Bond Angles (°)</i>  |            |               |          |
| O(1)-Cu(1)-N(1)         | 173.57(5)  | O(1)-Zn-O(1w) | 103.0(3) |
| O(1)-Cu(1)-N(2)         | 98.18(5)   | O(1)-Zn-N(1)  | 150.1(3) |
| N(1)-Cu(1)-N(2)         | 80.97(6)   | O(1w)-Zn-N(1) | 106.9(3) |
| O(1)-Cu(1)-N(6)         | 96.96(6)   | O(1)-Zn-N(3)  | 97.9(4)  |
| N(1)-Cu(1)-N(6)         | 82.78(6)   | O(1w)-Zn-N(3) | 98.6(3)  |
| N(1)-Cu(1)-O(4S)        | 82.46(5)   | N(1)-Zn-N(3)  | 77.0(3)  |
| O(1)-Cu(2)-N(4)         | 175.08(5)  | O(1)-Zn-N(2)  | 98.7(4)  |
| O(1)-Cu(2)-N(5)         | 97.50(5)   | O(1w)-Zn-N(2) | 101.2(3) |
| N(4)-Cu(2)-N(5)         | 81.21(5)   | N(1)-Zn-N(2)  | 76.4(3)  |
| O(1)-Cu(2)-N(3)         | 98.52(5)   | N(3)-Zn-N(2)  | 150.5(3) |
| N(4)-Cu(2)-N(3)         | 82.16(6)   |               |          |
| N(5)-Cu(2)-S(1)         | 103.98(5)  |               |          |
